# Supplementary material for: Photochemical upconversion and triplet annihilation limit from a boron dipyrromethene emitter
Source: Royal Society of Chemistry journal article supplement (doi:10.1039/c5pp00106d), 2015-06-03
Supplement: c5pp00106d1.pdf [file c5pp00106d1.pdf]

## Electronic Supporting Information for: Photochemical Upconversion and Triplet Annihilation Limit from a Boron Dipyrrromethene Emitter

F. Deng, A. J. Francis, W.W. Weare, and F. N. Castellano \*

Department of Chemistry, North Carolina State University, Raleigh, NC 27695-8204,  
USA.

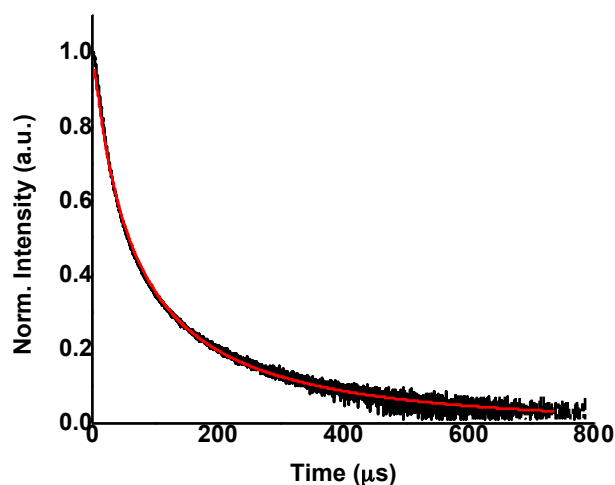

**Figure S1.** Square root (normalized to 1.0) of the delayed fluorescence intensity decay (black line) at 536 nm and the corresponding fit (red line) generated from 615 nm pulsed laser excitation (1.5 mJ/pulse) of PtTPTBP in the presence of Cl<sub>2</sub>PyBODIPY. The kinetic fit is to Eq. 1 ( $\beta = 0.807$ ;  $k_T = 3036 \text{ s}^{-1}$ ) and the relevant parameters ( $\alpha = 12695 \text{ s}^{-1}$ ;  $f_2 = 0.607$ ;  $\eta_{\text{conv}} = 0.79$ ;  $\phi_0 = 0.64$ ) were calculated using the approach of Schmidt and coworkers (reference 36). The important extracted parameter from this analysis is the initial (maximum) annihilation efficiency  $\phi_0 = 0.64$ .

$$\frac{[{}^3M^*]_t}{[{}^3M^*]_0} = \frac{1 - \beta}{\exp(k_T t) - \beta} \quad (1)$$

$\beta = \alpha / (k_T + \alpha)$  and  $\alpha = k_{TT}[{}^3M^*]_0$ ; where  $[{}^3M^*]_0$  is the initial sensitized triplet concentration and  $\beta$  equates to the initial fraction of triplet decay occurring through the bimolecular TTA channel.
